# Supplementary material
Source: ML conference proceedings conference paper supplement (https://proceedings.mlr.press/v80/imamura18a.html)
Supplement: Supplementary file [file imamura18a-supp.pdf]

---

# Supplementary Material of Analysis of Minimax Error Rate for Crowdsourcing and Its Application to Worker Cluster Model

---

Hideaki Imamura<sup>1,2</sup> Issei Sato<sup>1,2</sup> Masashi Sugiyama<sup>2,1</sup>

## A. Appendix: Proof of Lemma 1

**Lemma 1** (Fano’s inequality Fano (1949)).  
For any Markov chain  $V \rightarrow X \rightarrow \hat{V}$ , we have

$$h(P(\hat{V} \neq V)) + P(\hat{V} \neq V)(\log(|\mathcal{V}| - 1)) \geq H(V|\hat{V}),$$

where

$$h(p) = -p \log p - (1 - p) \log(1 - p),$$

$\mathcal{V}$  is the set of possible value of  $V$ , and  $H(V|\hat{V})$  is the entropy of  $V$  conditioned on  $\hat{V}$ .

*Proof of Lemma 1.*

This inequality follows by expanding the entropy in two different ways. Let  $E$  be the indicator random variable for the event that  $\hat{V} \neq V$ , that is,  $E = 1$  if  $\hat{V} \neq V$  and is 0 otherwise. Then we have

$$\begin{aligned} H(V, E|\hat{V}) &= H(V|E, \hat{V}) + H(E|\hat{V}) \\ &= P(E = 1)H(V|E = 1, \hat{V}) \\ &\quad + P(E = 0)H(V|E = 0, \hat{V}) + H(E|\hat{V}) \\ &= P(E = 1)H(V|E = 1, \hat{V}) + H(E|\hat{V}), \end{aligned}$$

where the last equation follows because there is no error, and  $V$  has no variability given  $\hat{V}$  if  $E = 0$ . Expanding the entropy by the chain rule in a different order, we have

$$\begin{aligned} H(V, E|\hat{V}) &= H(V|\hat{V}) + H(E|\hat{V}, V) \\ &= H(V|\hat{V}), \end{aligned}$$

because  $E$  is perfectly determined by  $V$  and  $\hat{V}$ . Combining

---

<sup>1</sup>The University of Tokyo, Tokyo, Japan <sup>2</sup>RIKEN, Tokyo, Japan. Correspondence to: Hideaki Imamura <imamura@ms.k.u-tokyo.ac.jp>.

these two equations, we have

$$\begin{aligned} H(V|\hat{V}) &= P(E = 1)H(V|E = 1, \hat{V}) + H(E|\hat{V}) \\ &= P(\hat{V} \neq V)H(V|E = 1, \hat{V}) + H(E|\hat{V}) \\ &\leq P(\hat{V} \neq V) \log(|\mathcal{V}| - 1) + H(E|\hat{V}) \\ &\leq P(\hat{V} \neq V) \log(|\mathcal{V}| - 1) + h(P(\hat{V} \neq V)), \end{aligned}$$

where the first inequality follows because  $V$  can take on at most  $|\mathcal{V}| - 1$  values when there is an error, and the last inequality follows by  $H(E|\hat{V}) \leq H(E) = h(P(\hat{V} \neq V))$ . The proof is complete.  $\square$

## B. Appendix: Detailed Derivation of Inference Algorithm

In this section, we show the detailed derivation of an inference algorithm for the proposed WC model.

### B.1. Empirical Variational Inference

To estimate latent variables and parameters, we adopt the strategy of *empirical variational inference*.

We want to maximize a following marginal log likelihood or *model evidence*.

$$\log p(X|\alpha, \beta, \Lambda) = \log \int p(X, G, \pi|\rho, \tau, \Lambda) dG d\pi.$$

However it is impossible to optimize the RHS’s integral analytically. Therefore, we will instead maximize the following evidence lower bound (ELBO).

$$\begin{aligned} &\log \int p(X, G, \pi|\rho, \tau, \Lambda) dG d\pi \\ &\geq \int q(G, \pi) \log \left( \frac{p(X, G, \pi|\rho, \tau, \Lambda)}{q(G, \pi)} \right) dG d\pi \\ &:= \text{ELBO}. \end{aligned}$$

We make an assumption of the mean field approximation for  $q(G, \pi)$ , that is,

$$q(G, \pi) = \left[ \prod_{i=1}^n q(G_i) \right] \left[ \prod_{j=1}^n q(\pi^j) \right].$$

On the basis on the variational method, maximizing ELBO yields the following expression.

$$\begin{aligned} q(G_i) &= \text{Mutinomial}(G_i|\hat{\theta}_i), \\ q(\pi^j) &= \text{Mutinomial}(f_\Lambda^{-1}(\pi^j)|\hat{\phi}_j), \end{aligned}$$

where  $\hat{\theta} = \{\hat{\theta}_i\}_{i=1}^n$ ,  $\hat{\phi} = \{\hat{\phi}_j\}_{j=1}^m$  are variational parameters. They satisfy the following equations.

$$\hat{\theta}_{i,k} = \frac{\exp(\sum_{j=1}^m \sum_{k'=1}^K \sum_l^L \delta(X_{i,j}=k') \hat{\phi}_{j,l} \log \Lambda_{l,k,k'} + \log \rho_k)}{\sum_{k=1}^K \exp(\sum_{j=1}^m \sum_{k'=1}^K \sum_l^L \delta(X_{i,j}=k') \hat{\phi}_{j,l} \log \Lambda_{l,k,k'} + \log \rho_k)}, \quad (1)$$

$$\hat{\phi}_{j,l} = \frac{\exp(\sum_{i=1}^n \sum_{k=1}^K \sum_{k'=1}^K \delta(X_{i,j}=k') \hat{\theta}_{i,k} \log \Lambda_{l,k,k'} + \log \tau_l)}{\sum_{l=1}^L \exp(\sum_{i=1}^n \sum_{k=1}^K \sum_{k'=1}^K \delta(X_{i,j}=k') \hat{\theta}_{i,k} \log \Lambda_{l,k,k'} + \log \tau_l)}. \quad (2)$$

We can calculate ELBO analytically as follows.

$$\begin{aligned} ELBO &= \sum_{i=1}^n \sum_{j=1}^m \sum_{k=1}^K \sum_{k'=1}^K \sum_{l=1}^L \hat{\theta}_{i,k} \hat{\phi}_{j,l} \delta(X_{i,j} = k') \log \Lambda_{l,k,k'} \\ &+ \sum_{i=1}^n \sum_{k=1}^K \hat{\theta}_{i,k} (\log \rho_k - \log \hat{\theta}_{i,k}) + \sum_{j=1}^m \sum_{l=1}^L \hat{\phi}_{j,l} (\log \tau_l - \log \hat{\phi}_{j,l}). \end{aligned} \quad (3)$$

We want to maximize ELBO with respect to  $\hat{\theta}$ ,  $\hat{\phi}$ ,  $\Lambda$ ,  $\rho$ , and  $\tau$ . Deriving the stationary condition for  $\{\hat{\theta}, \hat{\phi}\}$ , we get equations (1) and (2). Deriving the stationary condition for  $\{\Lambda, \rho, \tau\}$ , we get the following equations.

$$\rho_k = \frac{1}{n} \sum_{i=1}^n \hat{\theta}_{i,k}, \quad (4)$$

$$\tau_l = \frac{1}{m} \sum_{j=1}^m \hat{\phi}_{j,l}, \quad (5)$$

$$\Lambda_{l,k,k'} = \frac{\sum_{i=1}^n \sum_{j=1}^m \hat{\theta}_{i,k} \hat{\phi}_{j,l} \delta(X_{i,j} = k')}{\sum_{i=1}^n \sum_{j=1}^m \sum_{k'=1}^K \hat{\theta}_{i,k} \hat{\phi}_{j,l} \delta(X_{i,j} = k')}. \quad (6)$$

Using (1), (2) and (4)~(6) iteratively, we can get a local optimal solution of ELBO. We refer to the estimated values of  $G, \pi$  as  $\hat{G}, \hat{\pi}$ . From the above, it is possible to calculate the  $\hat{G}, \hat{\pi}$  as follows.

$$\hat{G}_i = \arg \max_k \hat{\theta}_{i,k}, \quad (7)$$

$$\hat{\pi}^j = \Lambda_{\ell_j}, \quad (8)$$

where the group to which the  $j$ -th worker belong is written as  $\ell_j$  and calculated as  $\ell_j = \arg \max_l \hat{\phi}_{j,l}$ .

Finally, we have derived Algorithm 1.

## B.2. Initialization Process

In this section, we discuss the initialization process of step [1] in Algorithm 1. We need to initialize  $\hat{\theta}, \hat{\phi}, \rho, \tau$ , and  $\Lambda$ .

The initialization process of  $\rho$  and  $\tau$  is simple. We use the equations (4) and (5) to initialize  $\rho$  and  $\tau$ . However, to initialize  $\rho$  and  $\tau$ , we need  $\hat{\theta}$  and  $\hat{\phi}$ . Thus, we need to initialize  $\hat{\theta}$  and  $\hat{\phi}$  first.

**Algorithm 1** Empirical Variational Inference for Worker Clustering Model

**Input:**  $X$

**Output:**  $\hat{G}, \hat{\pi}$

- 1 Initialize  $\hat{\theta}, \hat{\phi}, \rho, \tau, \Lambda$  appropriately (discussed later).
- 2 Update variational parameters by using (1) and (2)
- 3 Update hyper parameters by using (4)~(6)
- 4 Calculate ELBO (3), then compare it with previous ELBO value. If the increment is smaller than the threshold, go to the step [5], otherwise repeat from step [2]
- 5 Calculate estimated values  $\hat{G}, \hat{\pi}$  by using (7) and (8)

The initialization process of  $\hat{\theta}$  is the same as that of Dawid & Skene (1979) given by

$$\hat{\theta}_{i,k} = \frac{\sum_{j=1}^m \delta(X_{i,j} = k)}{\sum_{k=1}^K \sum_{j=1}^m \delta(X_{i,j} = k)}.$$

The initialization process of  $\hat{\phi}$  and  $\Lambda$  is a bit more complicated. First, we approximately calculate confusion matrices  $\pi = \{\pi^j\}_{j=1}^m$  of each worker  $j$  as done by Dawid & Skene (1979) as follows.

$$\pi_{k,k'}^j = \frac{\sum_{i=1}^n \hat{\theta}_{i,k} \delta(X_{i,j} = k')}{\sum_{k'=1}^K \sum_{i=1}^n \hat{\theta}_{i,k} \delta(X_{i,j} = k')}.$$

We want to separate all  $m$  workers into  $L$  groups. The ability of each group  $l \in \{1, 2, \dots, L\}$  is measured by  $\Lambda_l$ . The bigger the diagonal components of each  $\Lambda_l$  are, the higher the accuracy of group  $l$  is. Thus, we first calculate the trace norm of each  $\pi^j$ , namely  $\|\pi^j\|_*$  and then rearrange all workers in descending order according to  $\{\|\pi^j\|_*\}_{j=1}^m$  to obtain the permutation of workers  $\sigma = \begin{pmatrix} 1 & 2 & \dots & m \\ \sigma(1) & \sigma(2) & \dots & \sigma(m) \end{pmatrix}$ , where  $\sigma(j') = j$  means that the trace norm of the worker  $j$  is the  $j'$ -th largest. Second, we separate  $\{\sigma(j')\}_{j'=1}^m$  into  $L$  groups. In other words, let  $J_l = \{\sigma(\frac{m(l-1)}{L} + 1), \dots, \sigma(\frac{ml}{L})\}$ . Using this set, the initial values of  $\Lambda$  and  $\phi$  are below.

$$\begin{aligned} \Lambda_{l,k,k'} &= \frac{1}{m} \sum_{j \in J_l} \pi_{k,k'}^j, \\ \phi_{j,l} &= \delta(j \in J_l). \end{aligned}$$

## References

- Dawid, A. and Skene, A. Maximum likelihood estimation of observer error-rates using the em algorithm. *Applied Statistics*, 28(1):20–28, 1979.
- Fano, R. M. *Transmission of Information*. M.I.T. Press, 1949.
